# Supplementary material
Source: HighWire-hosted journal article supplement (https://ejhp.bmj.com/highwire/filestream/152809/field_highwire_adjunct_files/0/ejhpharm-2022-003365supp001_data_supplement.pdf)
Supplement: ejhpharm-2022-003365supp001_data_supplement.pdf [file ejhpharm-2022-003365supp001_data_supplement.pdf]

## Appendix A1: Included assessment tool items

Assessment items were included in the assessment tool if the total item weight was  $\geq 30$ . The included items with their respective weights are listed in **Table** . The included assessment items were combined into the consolidated assessment tool.

**Table A1.** Consolidated assessment tool

| Item <sup>a</sup>                                                                                                                                                       | Weight <sup>b</sup>   |
|-------------------------------------------------------------------------------------------------------------------------------------------------------------------------|-----------------------|
| <b>PTC's institutional integration</b>                                                                                                                                  |                       |
| Presence of an organisational regulation document: established policies and guidelines; defined responsibilities                                                        | 74<br>248             |
| Subcommittees or ad hoc committees: presence, type, and responsibilities                                                                                                | 222                   |
| <b>PTC member characteristics</b>                                                                                                                                       |                       |
| Number of members                                                                                                                                                       | 128                   |
| Expertise of members                                                                                                                                                    | 232                   |
| Disclosure of conflicts of interest: presence; frequency; strategy to deal with conflicts of interest                                                                   | 91<br>37<br>40        |
| Chairperson: presence and expertise                                                                                                                                     | 53                    |
| Pharmacist: presence; responsibilities                                                                                                                                  | 47<br>66              |
| <b>PTC performance indicators</b>                                                                                                                                       |                       |
| Use of performance indicators by the PTC                                                                                                                                | 81                    |
| <b>PTC meeting structure</b>                                                                                                                                            |                       |
| Meeting frequency                                                                                                                                                       | 183                   |
| Meeting duration                                                                                                                                                        | 30                    |
| Meeting minutes: preparation; distribution and accessibility                                                                                                            | 52<br>42              |
| Percentage of attendance in the last year                                                                                                                               | 30                    |
| <b>Formulary decision-making</b>                                                                                                                                        |                       |
| Responsible body for formulary decision-making                                                                                                                          | 190                   |
| Established guidelines for decision-making                                                                                                                              | 57<br>76              |
| Request process: presence of standardised request form; allowance for request; disclosure of conflicts of interest of requestor; included information                   | 44<br>53<br>68        |
| Formulary additions: presence of standardised process                                                                                                                   | 107                   |
| Formulary deletions: presence of standardised process; triggers                                                                                                         | 105<br>66             |
|                                                                                                                                                                         | 211                   |
| Revisions: presence of standardised process; established criteria which drugs are revised (e.g. newly added drugs); triggers; frequency; information used for revisions | 167<br>40<br>86<br>53 |

| <b>Formulary decision-making cont.</b>                                                                                                                                                                                                                                                                                                                                                                                                                                                                                       |     |
|------------------------------------------------------------------------------------------------------------------------------------------------------------------------------------------------------------------------------------------------------------------------------------------------------------------------------------------------------------------------------------------------------------------------------------------------------------------------------------------------------------------------------|-----|
|                                                                                                                                                                                                                                                                                                                                                                                                                                                                                                                              | 54  |
|                                                                                                                                                                                                                                                                                                                                                                                                                                                                                                                              | 40  |
| Drug monograph: preparation for additions, deletions, and/or revisions; person preparing the drug monograph; considerations made in the drug monograph; timeframe for preparation; established mechanism for expedited reviews; summary into advantages and disadvantages                                                                                                                                                                                                                                                    | 48  |
|                                                                                                                                                                                                                                                                                                                                                                                                                                                                                                                              | 30  |
|                                                                                                                                                                                                                                                                                                                                                                                                                                                                                                                              | 40  |
|                                                                                                                                                                                                                                                                                                                                                                                                                                                                                                                              | 31  |
|                                                                                                                                                                                                                                                                                                                                                                                                                                                                                                                              | 434 |
|                                                                                                                                                                                                                                                                                                                                                                                                                                                                                                                              | 211 |
|                                                                                                                                                                                                                                                                                                                                                                                                                                                                                                                              | 331 |
|                                                                                                                                                                                                                                                                                                                                                                                                                                                                                                                              | 121 |
|                                                                                                                                                                                                                                                                                                                                                                                                                                                                                                                              | 161 |
|                                                                                                                                                                                                                                                                                                                                                                                                                                                                                                                              | 140 |
|                                                                                                                                                                                                                                                                                                                                                                                                                                                                                                                              | 74  |
| Considerations: considerations made; safety; cost; efficacy; comparative effectiveness; clinical need; internal data; studies supported by the manufacturer; clinical practice guidelines; decisions by other hospitals; patient convenience; ease of medication preparation and administration; breadth of approved indications; expert opinions; use of minimal duplication strategy; standardised process for weighting considerations; required scientific level of studies and standardised process to evaluate studies | 47  |
|                                                                                                                                                                                                                                                                                                                                                                                                                                                                                                                              | 41  |
|                                                                                                                                                                                                                                                                                                                                                                                                                                                                                                                              | 62  |
|                                                                                                                                                                                                                                                                                                                                                                                                                                                                                                                              | 51  |
|                                                                                                                                                                                                                                                                                                                                                                                                                                                                                                                              | 91  |
|                                                                                                                                                                                                                                                                                                                                                                                                                                                                                                                              | 79  |
|                                                                                                                                                                                                                                                                                                                                                                                                                                                                                                                              | 72  |
|                                                                                                                                                                                                                                                                                                                                                                                                                                                                                                                              | 71  |
|                                                                                                                                                                                                                                                                                                                                                                                                                                                                                                                              | 105 |
|                                                                                                                                                                                                                                                                                                                                                                                                                                                                                                                              | 195 |
| Activity of other committees (e.g. subcommittees)                                                                                                                                                                                                                                                                                                                                                                                                                                                                            | 49  |
| Process to communicate decisions                                                                                                                                                                                                                                                                                                                                                                                                                                                                                             | 79  |
| Established tool for prioritising decisions                                                                                                                                                                                                                                                                                                                                                                                                                                                                                  | 37  |
| <b>Formulary characteristics</b>                                                                                                                                                                                                                                                                                                                                                                                                                                                                                             |     |
| Type of formulary items (medications from different ATC codes, medical devices, nutritional supplements)                                                                                                                                                                                                                                                                                                                                                                                                                     | 82  |
| Presence of specialty medications                                                                                                                                                                                                                                                                                                                                                                                                                                                                                            | 40  |
| Validity of formulary: inpatient and/or outpatient                                                                                                                                                                                                                                                                                                                                                                                                                                                                           | 44  |
| Establishment and enforcement of established restrictions by the formulary                                                                                                                                                                                                                                                                                                                                                                                                                                                   | 196 |
| Included supplementary information (e.g. established restrictions, administration route, or storage advices)                                                                                                                                                                                                                                                                                                                                                                                                                 | 54  |
| Listing of prices for each formulary item                                                                                                                                                                                                                                                                                                                                                                                                                                                                                    | 54  |
| Stockage: storage of all formulary drugs; storage of nonformulary medications                                                                                                                                                                                                                                                                                                                                                                                                                                                | 32  |
|                                                                                                                                                                                                                                                                                                                                                                                                                                                                                                                              | 32  |
| Accessibility of formulary                                                                                                                                                                                                                                                                                                                                                                                                                                                                                                   | 40  |
| <b>Strategies to guide formulary medication use</b>                                                                                                                                                                                                                                                                                                                                                                                                                                                                          |     |
| Pharmacist interventions to guide formulary medication use                                                                                                                                                                                                                                                                                                                                                                                                                                                                   | 78  |
| CPOE system: presence and used strategies to guide formulary medication use                                                                                                                                                                                                                                                                                                                                                                                                                                                  | 199 |
| Use of a CPOE system to enforce or communicate established restrictions                                                                                                                                                                                                                                                                                                                                                                                                                                                      | 80  |
| Medication information provided by the CPOE system                                                                                                                                                                                                                                                                                                                                                                                                                                                                           | 88  |
| Information on doses provided by the CPOE system                                                                                                                                                                                                                                                                                                                                                                                                                                                                             | 67  |
| Redirection of nonformulary item orders to formulary items                                                                                                                                                                                                                                                                                                                                                                                                                                                                   | 70  |
| Communication of drug shortages and possible therapeutic alternatives by the CPOE system                                                                                                                                                                                                                                                                                                                                                                                                                                     | 33  |

| <b>Strategies to guide formulary medication use cont.</b>                                                                                      |     |
|------------------------------------------------------------------------------------------------------------------------------------------------|-----|
| Requirement of indications for some medication orders                                                                                          | 48  |
|                                                                                                                                                | 216 |
| Written guidelines for formulary medication use: presence; responsibility; adherence<br>monitoring; review frequency                           | 154 |
|                                                                                                                                                | 98  |
|                                                                                                                                                | 53  |
| Existence of therapeutic interchange guidelines                                                                                                | 257 |
| Guidelines on established-use criteria                                                                                                         | 149 |
| Guidelines for off-label medication use                                                                                                        | 114 |
| Guidelines for investigational medication use                                                                                                  | 93  |
| Guidelines for medications with a high potential for medication errors                                                                         | 99  |
| Guidelines on generic substitution                                                                                                             | 79  |
| Guidelines for nonformulary medication use for patients stabilised on a nonformulary<br>medication                                             | 63  |
| Guidelines for managing drug shortages                                                                                                         | 83  |
| Guidelines for managing high-cost medications                                                                                                  | 52  |
| Guidelines for managing biosimilars                                                                                                            | 46  |
|                                                                                                                                                | 154 |
| Established guidelines for nonformulary medication use: presence and type; possibility for<br>prescription; requirement of prior authorisation | 106 |
|                                                                                                                                                | 101 |
|                                                                                                                                                | 262 |
| Clinical practice guidelines with included APIs: presence; involvement of the PTC                                                              | 153 |
| Embedment of clinical practice guidelines into the formulary                                                                                   | 54  |
| Educational programs on formulary and the PTC: existence and responsibility                                                                    | 180 |
| <b>Medication use evaluation</b>                                                                                                               |     |
| Percentage of formulary medications of all prescribed medications (formulary compliance)<br>and regular monitoring                             | 103 |
|                                                                                                                                                | 308 |
| Monitoring of medication use: presence; responsibility                                                                                         | 56  |
|                                                                                                                                                | 115 |
| Monitoring of adverse drug reactions: presence; responsibility                                                                                 | 95  |
| Monitoring of medication errors: presence and responsibility                                                                                   | 30  |
| Use of evaluation data by the PTC                                                                                                              | 40  |
| Inclusion of top ten prescribed medications in the formulary                                                                                   | 32  |

Abbreviations: ATC, Anatomical Therapeutic Chemical classification system; CPOE, computerised physician order entry; PTC, pharmacy and therapeutics committee. <sup>a</sup>The semicolons (;) in the description of the items mean that different publications were used to formulate the different parts of this item. If this is applicable, more than one respective weight and reference list appear in the respective weight and references column. The weights and reference lists are then sorted in the same way. <sup>b</sup>Item weights were calculated by adding up the publications weights of all publications which covered the respective assessment item in their full text.
